# Supplementary material for: Newly Developed Restorer Lines of Sorghum [Sorghum bicolor (L.) Moench] Resistant to Greenbug
Source: MDPI journal article supplement (doi:10.3390/plants13030425), 2024-01-31
Supplement: s1 [file s1]

**Table S1.** Chromosome-specific primers used in the study.

| Marker type   | Name           | Chr | Gene       | Sequence (5' - 3')                                       | Fragment size in parental lines (female/male), bp | Reference  |
|---------------|----------------|-----|------------|----------------------------------------------------------|---------------------------------------------------|------------|
| SSR           | Xtxp18         | 8   | <i>Rf1</i> | F:actgtctagaacaacctgcg<br>R:ttgctctagctaggcatttc         | 235/237                                           | [5,6]      |
| SSR           | Xtxp50         | 2   | <i>Rf2</i> | F:tgatgttggtacccttctgg<br>R:agcctatgtatgtgttcgtcc        | 304/317                                           | [7]        |
| SSR           | Xnhsbm1089     | 5   | <i>Rf5</i> | F:catttcacattcaaggatcatgg<br>R:acatttatgggtgcgtgctt      | 227/224                                           | [8]        |
| SSR           | SB2386         | 4   | <i>Rf6</i> | F:ggcggtaggtgtaaaaaggaagga<br>R:gcatgccctacgactcttgtgtct | 172/166                                           | [9]        |
| SSR           | Sb5_236        | 3   |            | F:gccaagagaaacacaaacaa<br>R:agcaatgtatttaggcaacaca       | 175/177                                           | [35]       |
| SSR           | <i>Sb6_342</i> | 7   |            | F:tgcttgtagagatgcctccct<br>R:gtgaacctgctgcttagtcgatg     | 290/285                                           | [35]       |
| SSR           | <i>Sb6_34</i>  | 8   |            | F:aacagcagtaatgccacac<br>R:tgacttggtagagaactgtcttc       | 204/194                                           | [35]       |
| STS           | 2459403        | 2   |            | F:caggggccaaatgtgttac<br>R: cacagttttatatttccgtgatagtg   | 935                                               | [26]       |
| CAPS/<br>MseI | CAPS-572       | 2   |            | F:caggggccaaatgtgttac<br>R:cacagttttatatttccgtgatagtg    | +572/-572                                         | This study |
| CAPS/<br>HpaI | CAPS-935       | 2   |            | F:caggggccaaatgtgttac<br>R:cacagttttatatttccgtgatagtg    | 935/935+753+182                                   | This study |

**Table S2.** CAPS and SSR polymorphic markers used for Principal component analysis.

| №  | Sample          | Marker/chromosome |      |             |     |            |     |            |     |                |     |            |     |             |     |             |     |            |     |
|----|-----------------|-------------------|------|-------------|-----|------------|-----|------------|-----|----------------|-----|------------|-----|-------------|-----|-------------|-----|------------|-----|
|    |                 | CAPS-572          |      | CAPS-935    |     | SSR Xtxp18 |     | SSR-Xtxp50 |     | SSR-Xnhsbm1089 |     | SSR-SB2387 |     | SSR-Sb5_236 |     | SSR-Sb6_342 |     | SSR-Sb6_34 |     |
|    |                 | Chr2              |      | Chr2        |     | Chr8       |     | Chr2       |     | Chr5           |     | Chr4       |     | Chr3        |     | Chr7        |     | Chr8       |     |
|    |                 | allele            |      | allele      |     | allele     |     | allele     |     | allele         |     | allele     |     | allele      |     | allele      |     | allele     |     |
|    |                 | -572              | +572 | 935+753+182 | 935 | 235        | 237 | 304        | 317 | 227            | 224 | 172        | 166 | 175         | 177 | 290         | 285 | 204        | 194 |
| 1  | Nizkorosloe 81s | 1                 | 0    | 1           | 0   | 1          | 0   | 1          | 0   | 1              | 0   | 1          | 0   | 1           | 0   | 1           | 0   | 1          | 0   |
| 2  | 929-3           | 0                 | 1    | 0           | 1   | 0          | 1   | 0          | 1   | 0              | 1   | 0          | 1   | 0           | 1   | 0           | 1   | 0          | 1   |
| 3  | 928-1           | 0                 | 1    | 0           | 1   | 0          | 1   | 0          | 1   | 0              | 1   | 0          | 1   | 0           | 1   | 0           | 1   | 0          | 1   |
| 4  | R-929-1         | 0                 | 1    | 0           | 1   | 1          | 0   | 0          | 1   | 1              | 0   | 1          | 0   | 1           | 0   | 1           | 0   | 1          | 0   |
| 5  | R-929-2         | 0                 | 1    | 0           | 1   | 1          | 0   | 0          | 1   | 1              | 0   | 1          | 0   | 1           | 0   | 1           | 0   | 1          | 0   |
| 6  | R-929-3         | 0                 | 1    | 0           | 1   | 1          | 0   | 0          | 1   | 1              | 0   | 1          | 0   | 0           | 1   | 1           | 0   | 1          | 0   |
| 7  | R-928-1         | 0                 | 1    | 0           | 1   | 1          | 0   | 0          | 1   | 1              | 0   | 1          | 0   | 1           | 0   | 1           | 0   | 1          | 0   |
| 8  | R-928-2         | 0                 | 1    | 0           | 1   | 1          | 0   | 0          | 1   | 1              | 0   | 1          | 0   | 1           | 0   | 1           | 0   | 1          | 0   |
| 9  | R-928-3         | 0                 | 1    | 0           | 1   | 1          | 0   | 0          | 1   | 0              | 1   | 1          | 0   | 1           | 0   | 1           | 0   | 0          | 1   |
| 10 | R-928-4         | 0                 | 1    | 0           | 1   | 1          | 0   | 0          | 1   | 0              | 1   | 1          | 0   | 1           | 0   | 1           | 0   | 0          | 1   |
| 11 | R-928-5         | 0                 | 1    | 0           | 1   | 1          | 0   | 0          | 1   | 0              | 1   | 1          | 0   | 1           | 0   | 1           | 0   | 0          | 1   |

Table S3. Sequence polymorphisms within the *Rf2* candidate gene fragment

| GenBank accession,<br>genotype | Nucleotide position according to<br>GenBank accession number<br>Sobic.002G057050 | Reference                                                                                                             |
|--------------------------------|----------------------------------------------------------------------------------|-----------------------------------------------------------------------------------------------------------------------|
|                                | 1087-1097*                                                                       |                                                                                                                       |
| Sobic.002G057050               | GTT <b><u>AA</u></b> CCTTAA                                                      | <a href="https://bioinformatics.psb.ugent.be/plaza/versions/">https://bioinformatics.psb.ugent.be/plaza/versions/</a> |
| XM_002459403                   | GTT <b><u>AA</u></b> CCTTAA                                                      | <a href="https://www.ncbi.nlm.nih.gov/">https://www.ncbi.nlm.nih.gov/</a>                                             |
| FambeA, CMS line               | GTT <b><u>A</u></b> TTTTTGC                                                      | [11]                                                                                                                  |
| Lata (R male inbred line)      | GTT <b><u>T</u></b> TTTTTGC                                                      | [11]                                                                                                                  |
| Nizkorosloe 81s                | GTT <b><u>AA</u></b> CCTTAA                                                      | [15]                                                                                                                  |
| 928-2, R-line                  | GTT <b><u>T</u></b> TTTTTGC                                                      | [15]                                                                                                                  |
| 929-3, R-line                  | GTT <b><u>T</u></b> TTTTTGC                                                      | [15]                                                                                                                  |

\* positions 1090 and 1091 are highlighted in bold and underlined

**Table S4.** Sedimentation values for studied sorghum lines.

| Flour           | Sedimentation value/Acetic acid variant (AA), ml | Sedimentation value/SDS variant, ml | SDS/AA  |
|-----------------|--------------------------------------------------|-------------------------------------|---------|
| Nizkorosloe 81s | 43,0±1,0                                         | 29,5±0,5                            | 0,7±0,0 |
| 929-3           | 47,0±1,0                                         | 46,0±1,0                            | 1.0±0,0 |
| 928-1           | 46,5±1,5                                         | 46,5±2,5                            | 1,0±0,0 |
| R-929-1         | 38,0±0,0                                         | 51,0±1,0                            | 1,3±0,0 |
| R-929-2         | 38,5±2,5                                         | 49,0±1,0                            | 1,3±0,1 |
| R-929-3         | 40,5±0,5                                         | 55,5±2,5                            | 1,4±0,1 |
| R-928-1         | 38,5±0,5                                         | 44,5±0,5                            | 1,2±0,0 |
| R-928-2         | 39,0±1,0                                         | 39,0±1,0                            | 1,0±0,0 |
| R-928-3         | 38,0±2,0                                         | 46,5±0,5                            | 1,2±0,1 |
| R-928-4         | 38,0±0,0                                         | 48,0±2,0                            | 1,3±0,1 |
| R-928-5         | 38,0±0,0                                         | 46,0±0,0                            | 1,2±0,0 |

**Table S5.** The rheological characteristics of sorghum-wheat flour composites (average value \* for studied lines).

| Composite ratio (% Sorghum) | Development time (min). | Stability (min). | Liquefaction of the dough in 10 minutes from the start point of the experiment; BU*** | Liquefaction of the dough in 12 minutes from the extreme point on the farinogram (from the moment the dough is ready); BU*** | Flour quality indicator (mm is Quality Number) | Valorimeter value; BU*** |
|-----------------------------|-------------------------|------------------|---------------------------------------------------------------------------------------|------------------------------------------------------------------------------------------------------------------------------|------------------------------------------------|--------------------------|
| 10%                         | 3,20±0,09               | 1,08±0,05        | 66,37±5,1                                                                             | 85,50±5,07                                                                                                                   | 44,75±1,28                                     | 48,12±1,4                |
| 30%                         | 5,34±1,13               | 3,926±1,31       | 17,63±6,16                                                                            | 39,12±6,73                                                                                                                   | 143,87±24,56                                   | 64,00±3,7                |
| 0% **                       | 3,02                    | 0,87             | 113,00                                                                                | 143,00                                                                                                                       | 39,00                                          | 41,00                    |

\*sample average value

\*\*Test: wheat flour

\*\*\*BU – Brabender units
